# Supplementary figures and images for: Plug-and-Play Lymph Node-on-Chip: Secondary Tumor Modeling by the Combination of Cell Spheroid, Collagen Sponge and T-Cells
Source: MDPI journal article supplement (doi:10.3390/ijms24043183), 2023-02-06

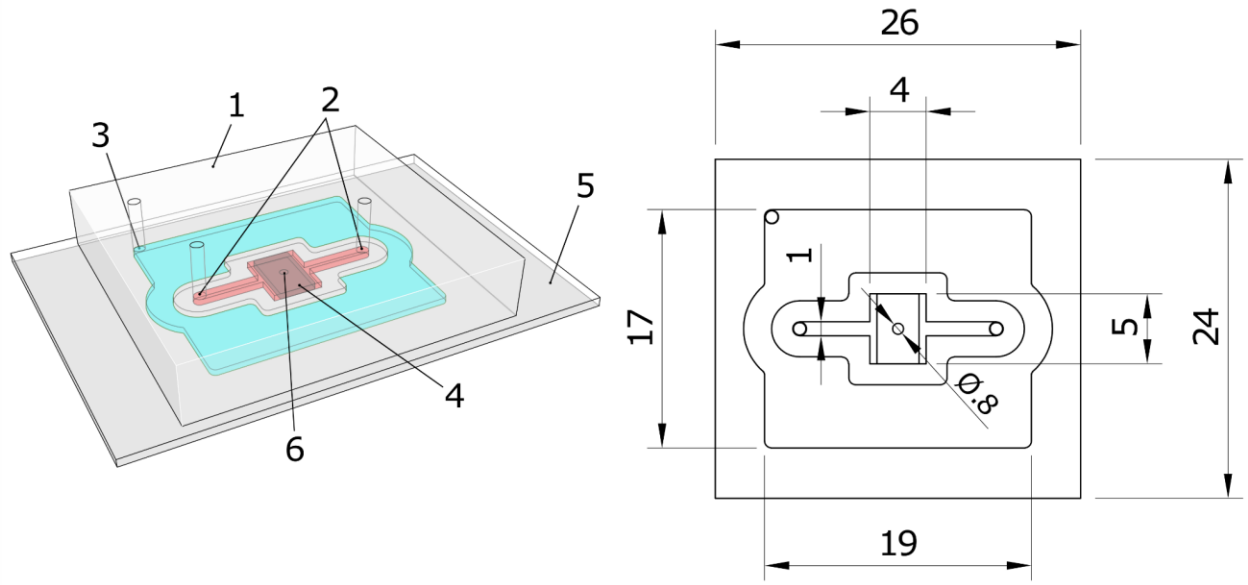

Video S1. Assembly and Application Process of the Lymph Node-on-Chip System

Supplement: s1 [file s1]
